# Supplementary material for: Silymarin Protects against Acute Liver Injury Induced by Acetaminophen by Downregulating the Expression and Activity of the CYP2E1 Enzyme
Source: MDPI journal article supplement (doi:10.3390/molecules27248855), 2022-12-13
Supplement: s1 [file s1]

# Supplementary materials: Silymarin Protects Against Acute Liver Injury Induced by Acetaminophen via Downregulating the Expression and Activity of CYP2E1 Enzyme

Weipei Yang, Zhongxu Liang, Chengming Wen, Xuehua Jiang and Ling Wang

## 1. Figures

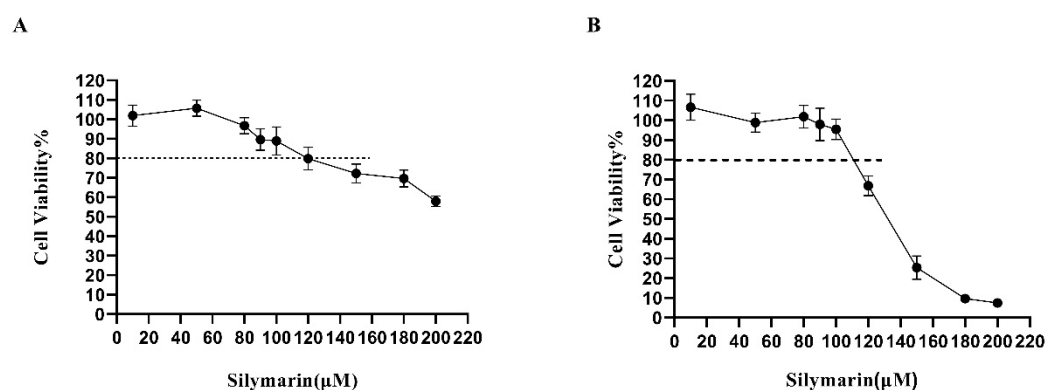

**Figure S1.** The effect of silymarin on cell viability was determined by an MTT assay. HepG2 cells were treated with different concentrations of silymarin for 24 h (A) and 48 h (B). Data were expressed as the mean  $\pm$  SD, n=3.

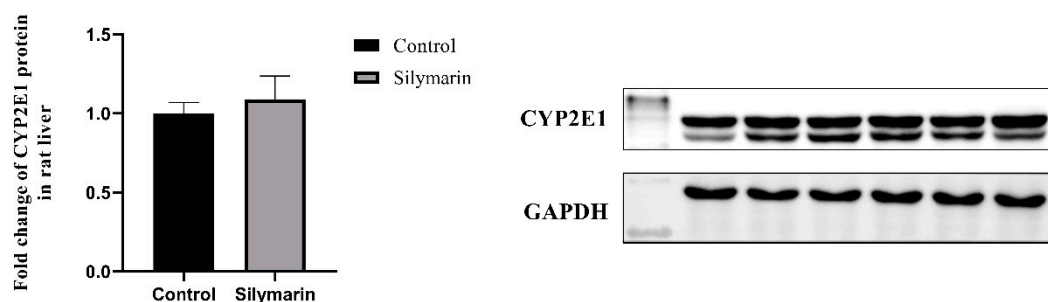

**Figure S2.** Protein expression of CYP2E1 in rat liver after 21 days of silymarin pretreatment. The protein expression levels of CYP2E1 were normalized to GAPDH. Data were expressed as mean  $\pm$  SD, n=6.

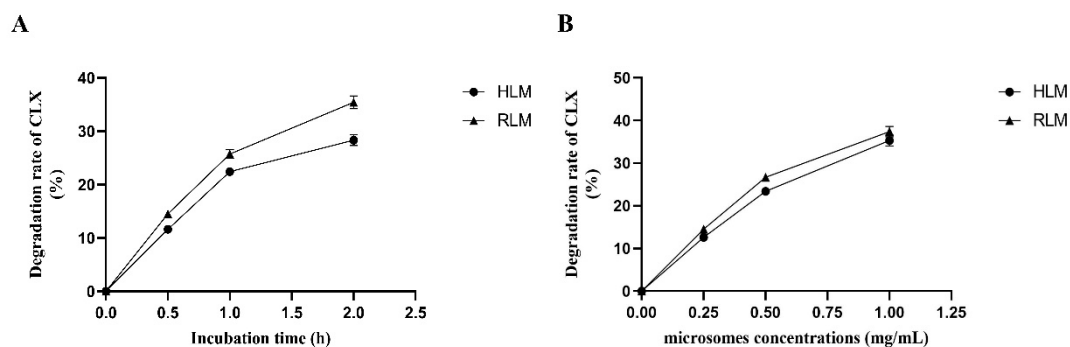

**Figure S3.** Screening of the incubation time (A) and microsomal concentrations (B) in the *in vitro* metabolism system of HLMs and RLMs. Data were expressed as the mean  $\pm$  SD, n=3.

As most reportedly, the substrate conversion rate is generally limited between 10%-20% in the *in vitro* studies on CYP450 enzyme-mediated metabolism. Thus, we selected 0.25 mg/mL HLMs/RLMs incubated 0.5 h as the incubation condition in our study on the effects of SM on CYP2E1-mediated metabolism according to the data shown in Figure S3.

## 2. Tables

**Table S1** HPLC–MS/MS conditions for detection of CLX and 6-OH-CLX

| Analyte                       | Chlorzoxazone                                                    | 6-OH-Chlorzoxazone |
|-------------------------------|------------------------------------------------------------------|--------------------|
| MRM transition<br>(Q1-Q3 m/z) | 168.1-131.4                                                      | 184.2-119.7        |
| Collision Energy              | -34.2                                                            | -27.0              |
| Declustering Potential        | -36.7                                                            | -49.1              |
| Chromatographic column        | CAPCELL PAK C18, 50 × 2.00 mm 5µm                                |                    |
| Mobile phase                  | A: 5mM ammonium acetate in 0.1% formic acid water<br>B: Methanol |                    |
| Gradient pattern              | 0-0.50 min/10% B, 0.51-2.00 min/95% B,<br>2.01-2.50 min/10% B    |                    |

**Table S2** HPLC–MS/MS conditions for detection of APAP and its metabolites

| Analyte                       | APAP                                                      | APAP-gluc   | APAP-GSH    | APAP-CYS    |
|-------------------------------|-----------------------------------------------------------|-------------|-------------|-------------|
| MRM transition<br>(Q1-Q3 m/z) | 152.1-109.6                                               | 328.1-152.3 | 457.5-328.3 | 271.2-139.9 |
| Collision Energy              | 23.1                                                      | 28.4        | 25.7        | 30.4        |
| Declustering Potential        | 72.9                                                      | 45.3        | 65.3        | 47.6        |
| Chromatographic column        | CAPCELL PAK C18, 50 × 2.00 mm 5µm                         |             |             |             |
| Mobile phase                  | A: 0.1% formic acid in water, B: Methanol                 |             |             |             |
| Gradient pattern              | 0-1.00min/10% B, 1.01-2.50 min/90% B, 2.51-3.00 min/10% B |             |             |             |

**Table S3** Primer sequences for real-time quantitative PCR (RT–qPCR)

| Gene   | Source | Forward (5' to 3')           | Reverse (5' to 3')          | Amplicon                                                                                                                            |
|--------|--------|------------------------------|-----------------------------|-------------------------------------------------------------------------------------------------------------------------------------|
| CYP2E1 | human  | AATGGACCTACCT<br>GGAAGGAC    | CCTCTGGATCCGG<br>CTCTCATT   | AATGGACCTACCTGGAAGGACATCCGGCGGTTTTCCCTGACCACCCTCCGGAACTATG<br>GGATGGGGAAACAGGGCAATGAGAGCCGGATCCAGAGG                                |
| GAPDH  | human  | CTGGGCTACACTG<br>AGCACC      | AAGTGGTCGTTG<br>AGGGCAATG   | CTGGGCTACACTGAGCACCAGGTGGTCTCCTCTGACTTCAACAGCGACACCCACTCC<br>TCCACCTTTGACGCTGGGGCTGGCATTGCCCTCAACGACCACTT                           |
| Cyp2e1 | mice   | TTTCCCTAAGTATC<br>CTCCGTGACT | GCTGGCCTTTGGT<br>CTTTTTG    | TTTCCCTAAGTATCCTCCGTGACTGGGGAATGGGGAAACAGGGTAATGAGGCCCGCAT<br>CCAAAGAGAGGCACACTTCCTGGTGGAGGAGCTCAAAAAGACCAAAGGCCAGC                 |
| Gapdh  | mice   | AGGTCGGTGTGAA<br>CGGATTTG    | TGTAGACCATGTA<br>GTTGAGGTCA | AGGTCGGTGTGAACGGATTTGGCCGTATTGGGCGCCTGGTCACCAGGGCTGCCATTT<br>GCAGTGGCAAAGTGGAGATTGTTGCCATCAACGACCCCTTCATTGACCTCAACTACAT<br>GGTCTACA |

**Table S4** Silymarin concentrations in plasma and liver of rats after multiple doses of silymarin administration (n=6)

|                    | plasma      | liver tissue |
|--------------------|-------------|--------------|
| Concentration (μM) | 0.35 ± 0.06 | 12.28 ± 1.06 |
